# Supplementary material for: Morale in the oldest old: the Umeå 85+ study
Source: Oxford University Press journal article supplement (doi:10.1093/ageing/afi044), 2005-03-22

## Supplementary Data

**Appendix 1.** Factors associated with the total scores of the Philadelphia Geriatric Center  
Morale Scale, PGCMS.

| <b>Variable</b>           | <b>Correlation</b> | <b><i>P</i></b> |
|---------------------------|--------------------|-----------------|
|                           | <b>(Pearson)</b>   |                 |
| Age                       | -.154              | .030            |
| <b>Functional factors</b> |                    |                 |
| FES(S) score              | .270               | <.001           |
| Barthel Index of ADL      | .214               | .002            |
| Berg Balance Scale score  | .200               | .006            |
| <b>Medical factors</b>    |                    |                 |
| Number of drugs           | -.278              | <.001           |
| Number of symptoms        | -.414              | <.001           |
| MMSE score                | .255               | <.001           |
| MNA score                 | .338               | <.001           |
| GDS score                 | -.656              | <.001           |

FES(S)= Falls Efficacy Scale (modified Swedish version); MMSE=Mini Mental State Examination;  
MNA=Mini Nutritional Assessment; GDS=Geriatric Depression Scale.

Appendix 2. Flow chart of the study sample

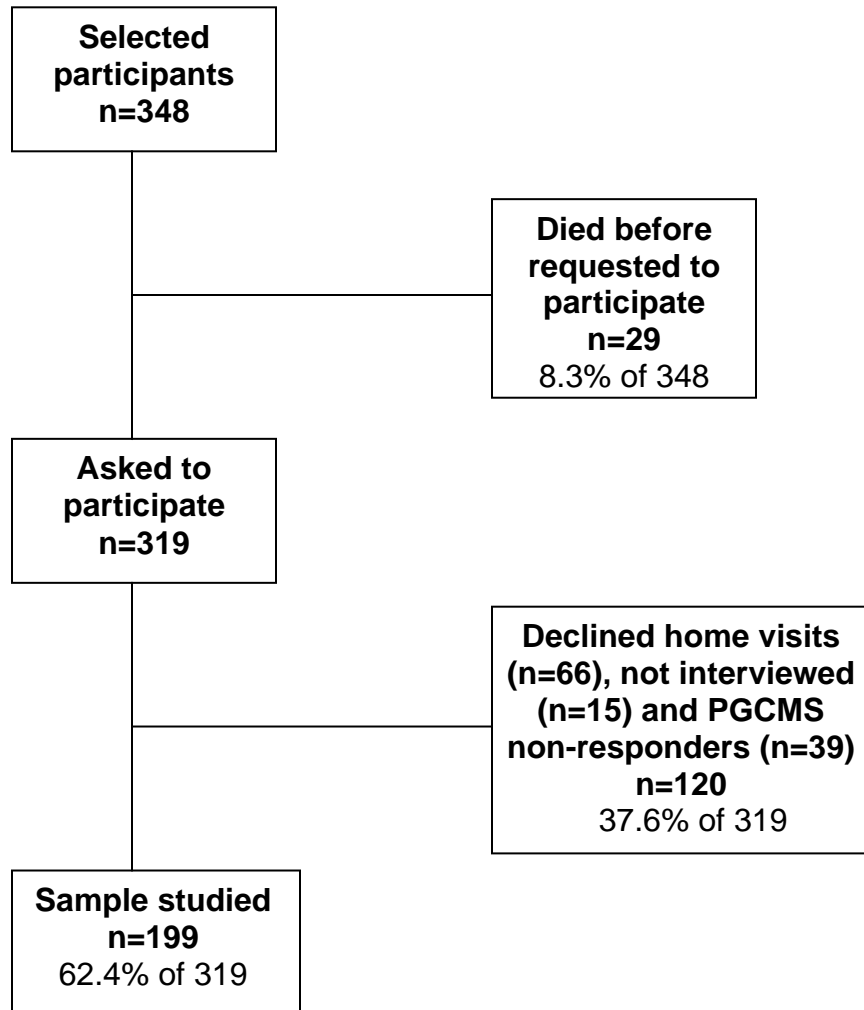

Supplement: afi044_Supplementary_Data.zip [file afi044_Supplementary_Data.zip]
