# Supplementary material for: Morale in the oldest old: the Umeå 85+ study
Source: Oxford University Press journal article supplement (doi:10.1093/ageing/afi044), 2005-03-22
Supplement: afi044_Supplementary_Data.zip [file afi044_Supplementary_Data.zip]

Archive with 1 entries (1 files):
- afio44Supplementary_Data.pdf
